# Supplementary material for: Synthesis, structure, magnetism and photocatalysis of α-Fe2O3nanosnowflakes
Source: Royal Society of Chemistry journal article supplement (doi:10.1039/c9ra07490b), 2019-01-01
Supplement: c9ra07490b1.pdf [file c9ra07490b1.pdf]

## Synthesis, Structure, Magnetism and Photocatalysis of $\alpha$ -Fe<sub>2</sub>O<sub>3</sub> Nanosnowflakes \*

Fang Wang,<sup>a</sup> Le Xin Song,<sup>\*a,b</sup> Yue Teng,<sup>c</sup> Juan Xia,<sup>d</sup> Zhe Yuan Xu<sup>a</sup> and Wei Ping Wang<sup>a</sup>

<sup>a</sup> Department of Chemistry, University of Science and Technology of China, Jinzhai Road 96, Hefei 230026, P. R. China  
E-mail: solexin@ustc.edu.cn; Fax: +86-551-63601592;

<sup>b</sup> National Synchrotron Radiation Laboratory, University of Science and Technology of China, Hefei 230026, P. R. China

<sup>c</sup> State Grid Anhui Electric Power Research Institute, Ziyun Road 299, Hefei 230601, P. R. China

<sup>d</sup> Department of Chemistry, Fuyang Normal University, QingHe Road 100, Fuyang 236037, P. R. China

10

### A list of the contents for all the Supporting Information

---

#### Pages Contents

---

|    |                                                                                                                                                                                 |
|----|---------------------------------------------------------------------------------------------------------------------------------------------------------------------------------|
| 1  | A table of contents                                                                                                                                                             |
| 2  | <b>Figure S1.</b> (a) The average diameter size distribution of the complete nanosnowflakes; (b) the average width                                                              |
| 3  | size distribution of the petals.                                                                                                                                                |
|    | <b>Figure S2.</b> The SEM images and XRD patterns of the $\alpha$ -Fe <sub>2</sub> O <sub>3</sub> samples obtained by a hydrothermal process                                    |
| 4  | of a) PVP/PF-3, b) -4 and c) -6 at 393 K for 6 h.                                                                                                                               |
| 5  | <b>Figure S3.</b> (a) The XRD and (b) the FE-SEM of the $\alpha$ -Fe <sub>2</sub> O <sub>3</sub> crystal with a branched dendritic-like                                         |
| 6  | nanostructure obtained from the hydrothermal process of the PVP/PF-0.                                                                                                           |
|    | <b>Figure S4.</b> The fractional mass loss per second ( $v$ , %·s <sup>-1</sup> ) as a function of temperature for PF and PVP/PF-5                                              |
| 7  | at heating rate of 10 K·min <sup>-1</sup> .                                                                                                                                     |
|    | <b>Figure S5.</b> The SEM images and XRD patterns of the $\alpha$ -Fe <sub>2</sub> O <sub>3</sub> samples obtained by a hydrothermal process                                    |
| 8  | of PVP/PF-5 for 6 h. at : a) 373, b) 413 and c) 433 K.                                                                                                                          |
|    | <b>Figure S6.</b> The SEM images of the $\alpha$ -Fe <sub>2</sub> O <sub>3</sub> samples obtained by a hydrothermal process of PVP/PF-5 at 393                                  |
| 9  | K for a) 3, b) 4, c) 5 and d) 7 h.                                                                                                                                              |
|    | <b>Figure S7.</b> The field dependence of magnetization at 5 and 300 K of the $\alpha$ -Fe <sub>2</sub> O <sub>3</sub> -2.                                                      |
|    | <b>Figure S8.</b> The absorption spectra of the mixed dyes (MO and CV) solutions on the $\alpha$ -Fe <sub>2</sub> O <sub>3</sub> -1 in the                                      |
| 10 | presence of H <sub>2</sub> O <sub>2</sub> with different illumination times: 0~80 min. 20 mg of the $\alpha$ -Fe <sub>2</sub> O <sub>3</sub> -1 was added to a                  |
| 11 | solution of the mixed dyes (40 mL MO and 40 mL CV, 10 mg·L <sup>-1</sup> ).                                                                                                     |
| 12 | <b>Figure S9.</b> The room temperature UV/Vis DRS (a) and plots of $(Ah\nu)^2$ vs $h\nu$ (b) of the $\alpha$ -Fe <sub>2</sub> O <sub>3</sub> -1 and -2.                         |
| 13 | <b>Figure S10.</b> The absorption spectra of R6G on the $\alpha$ -Fe <sub>2</sub> O <sub>3</sub> -1 in the absence of H <sub>2</sub> O <sub>2</sub> with different illumination |
|    | times: 0~80 min.                                                                                                                                                                |

---

15

20

5

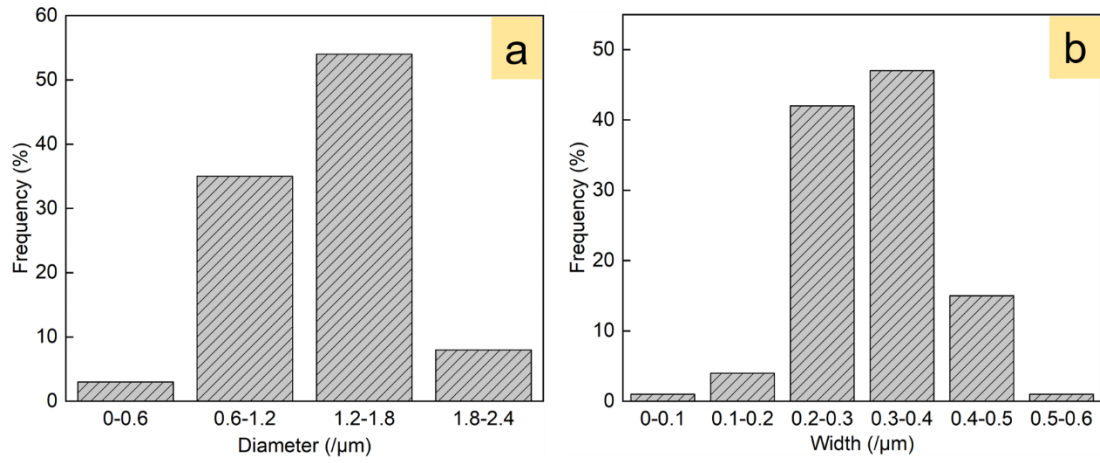

**Figure S1.** (a) The average diameter size distribution of the complete nanosnowflakes; (b) the average width size distribution of the petals.

10

15

20

25

30

35

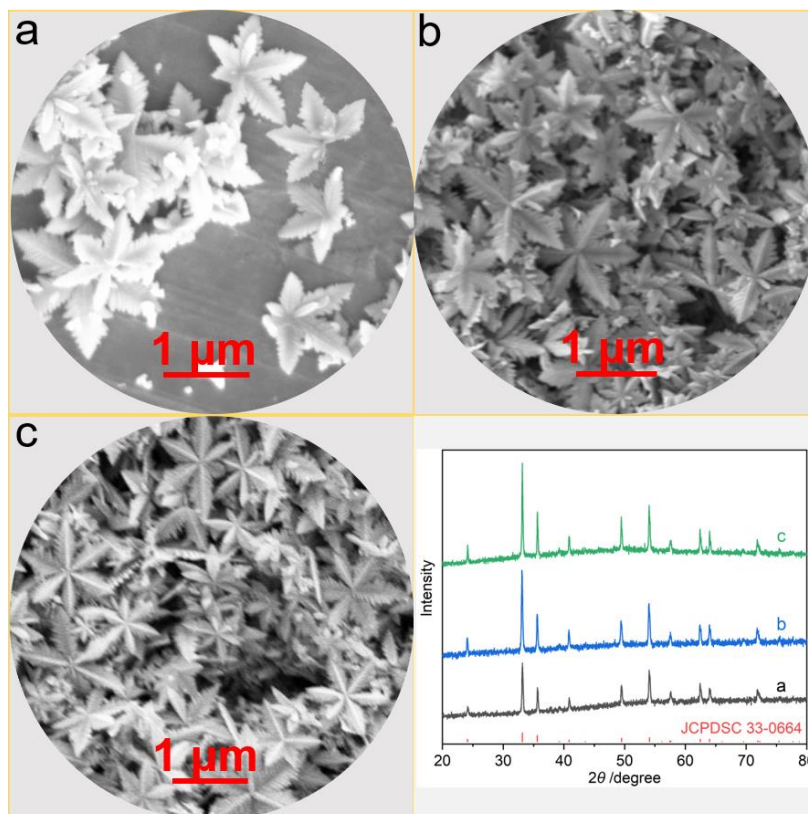

**Figure S2.** The SEM images and XRD patterns of the  $\alpha$ -Fe<sub>2</sub>O<sub>3</sub> samples obtained by a hydrothermal process of a) PVP/PF-3, b) -4 and c) -6 at 393 K for 6 h.

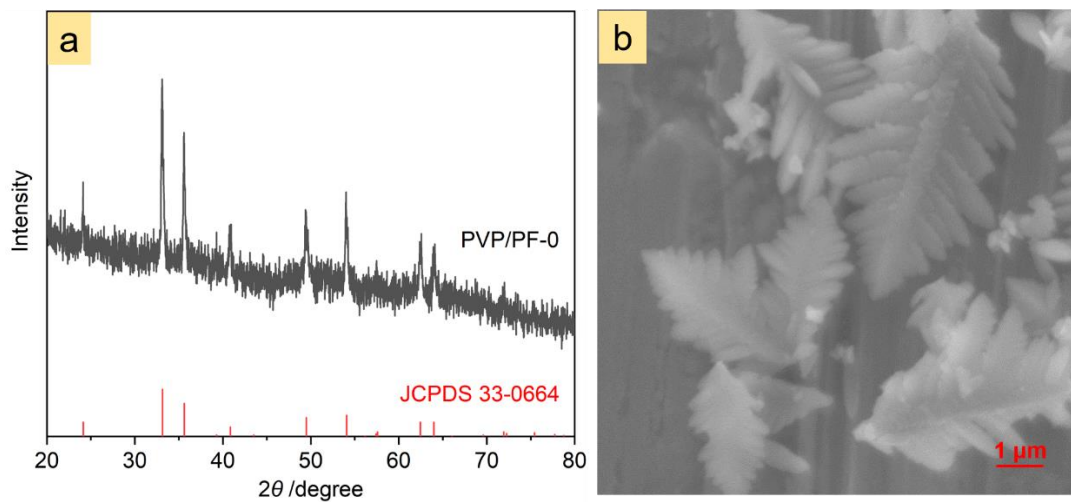

**Figure S3.** (a) The XRD pattern and (b) FE-SEM of the  $\alpha\text{-Fe}_2\text{O}_3\text{-2}$  crystal with a branched dendritic-like nanostructure obtained from the hydrothermal process of the PVP/PF-0.

5

10

15

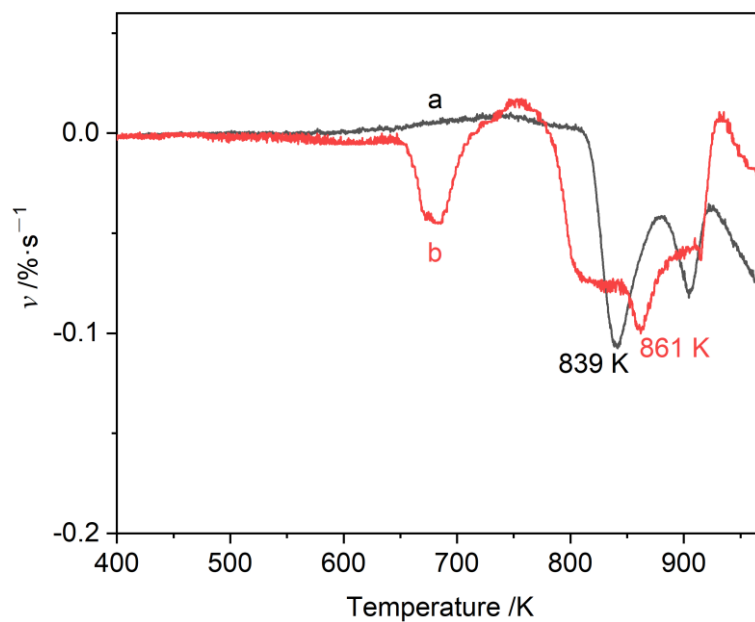

**Figure S4.** The fractional mass loss per second ( $v$ ,  $\% \cdot s^{-1}$ ) as a function of temperature for (a) PF and (b) PVP/PF-5 at heating rate of  $10 \text{ K} \cdot \text{min}^{-1}$ .

5

10

15

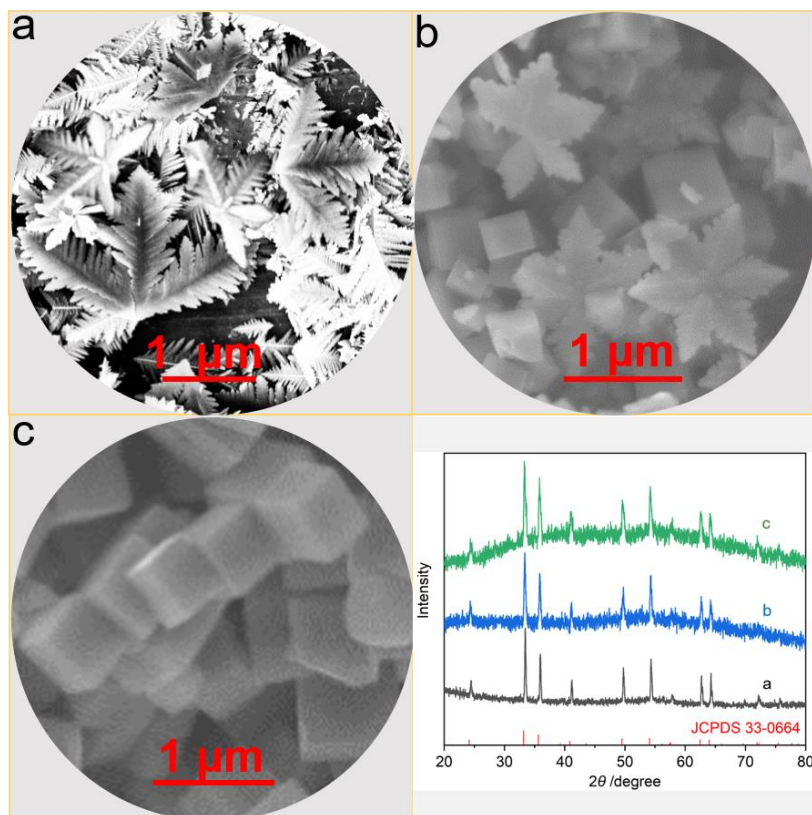

**Figure S5.** The SEM images and XRD patterns of the  $\alpha$ -Fe<sub>2</sub>O<sub>3</sub> samples obtained by a hydrothermal process of PVP/PF-5 for 6 h at a) 373, b) 413 and c) 433 K.

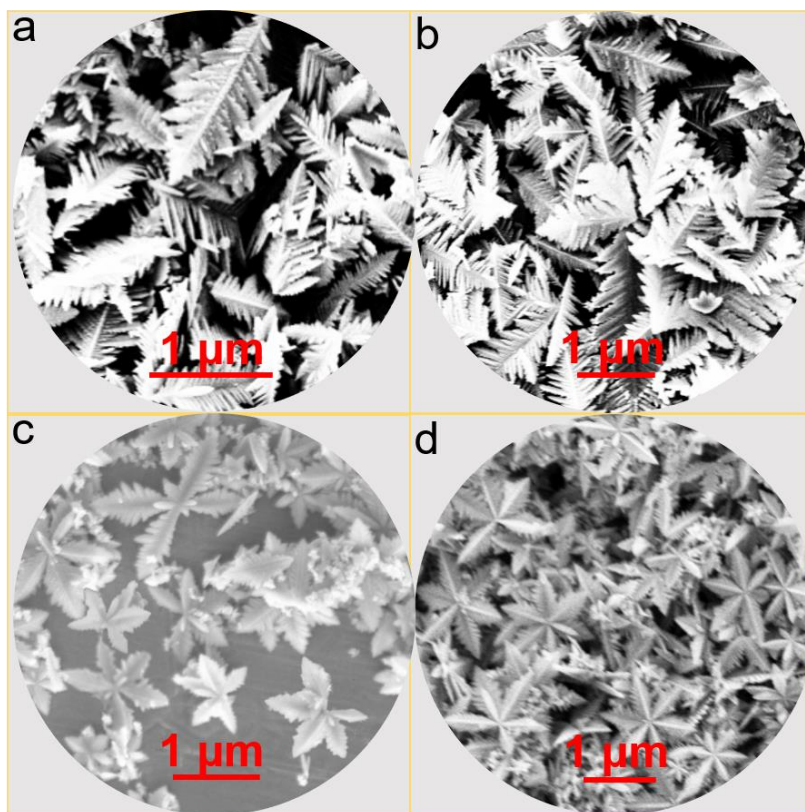

**Figure S6.** The SEM images of the  $\alpha$ -Fe<sub>2</sub>O<sub>3</sub> samples obtained by a hydrothermal process of PVP/PF-5 at 393 K for a) 3, b) 4, c) 5 and d) 7 h.

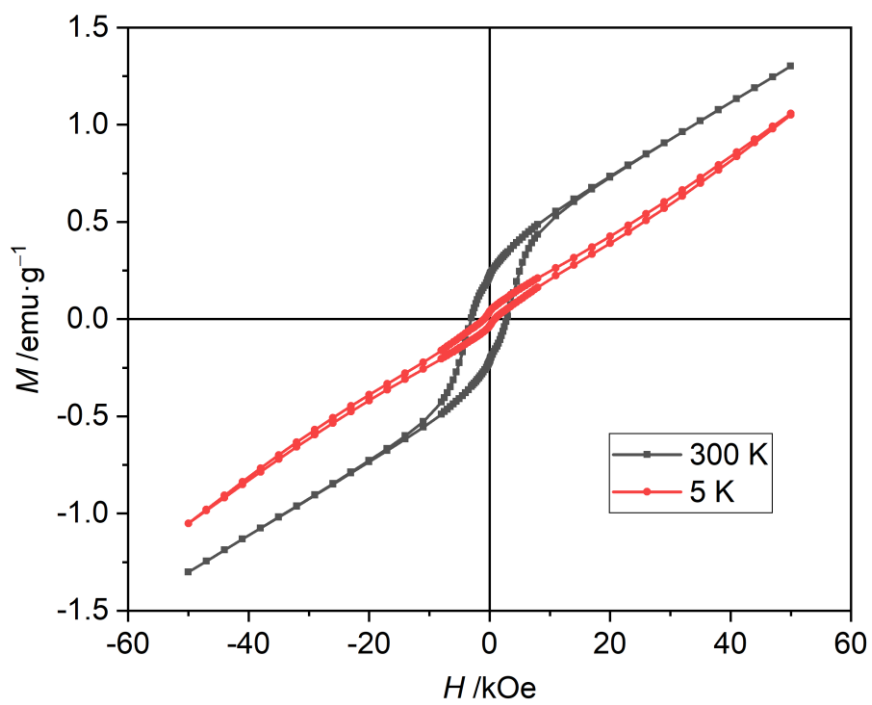

**Figure S7.** The field dependence of magnetization at 5 and 300 K of the  $\alpha\text{-Fe}_2\text{O}_3\text{-2}$ .

5

10

15

20



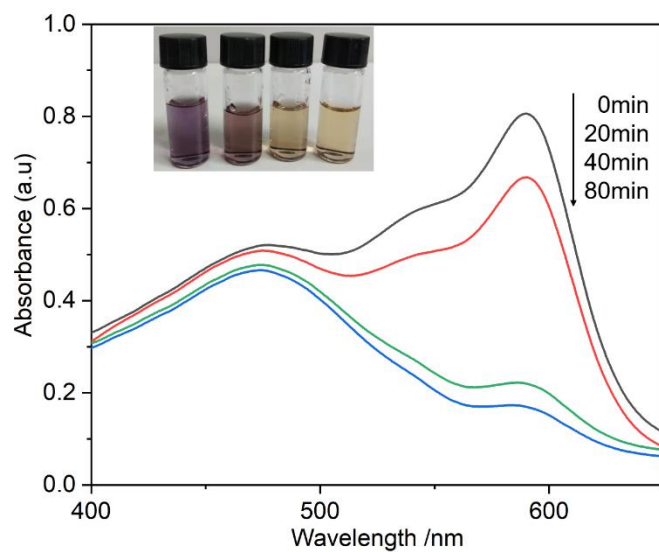

**Figure S8.** The absorption spectra of the mixed dyes (MO and CV) solutions on the  $\alpha\text{-Fe}_2\text{O}_3\text{-1}$  in the presence of  $\text{H}_2\text{O}_2$  with different illumination times: 0~80 min. 20 mg of the  $\alpha\text{-Fe}_2\text{O}_3\text{-1}$  was added to a solution of the mixed dyes (40 mL MO and 40 mL CV,  $10\text{ mg}\cdot\text{L}^{-1}$ ).

5

10

15

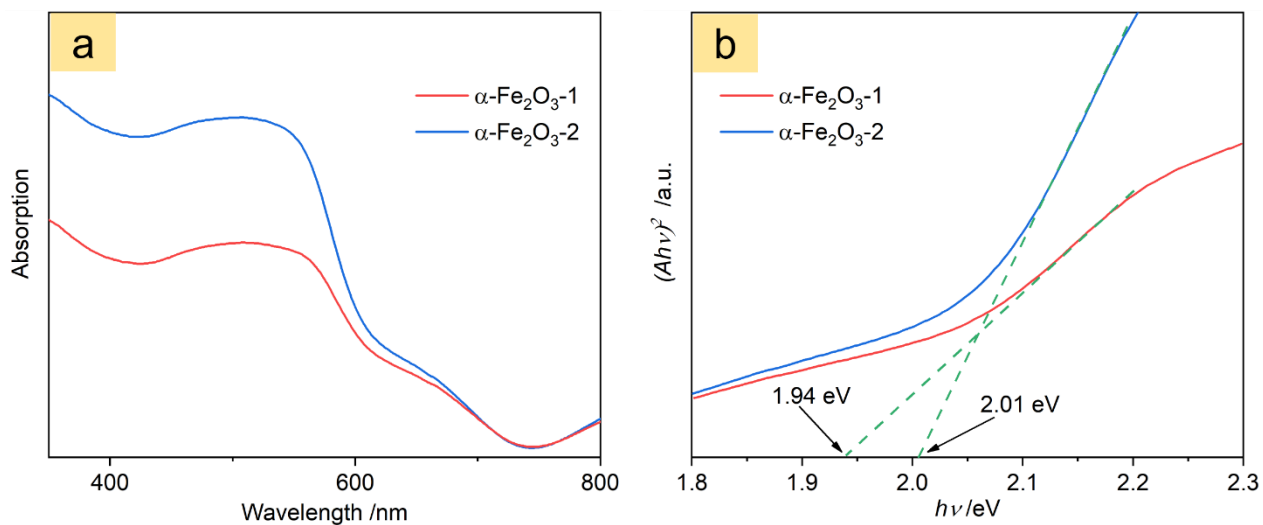

**Figure S9.** The room temperature UV/Vis DRS (a) and plots of  $(Ah\nu)^2$  vs  $h\nu$  (b) of the  $\alpha$ -Fe<sub>2</sub>O<sub>3</sub>-1 and -2.

5

10

15

20

25

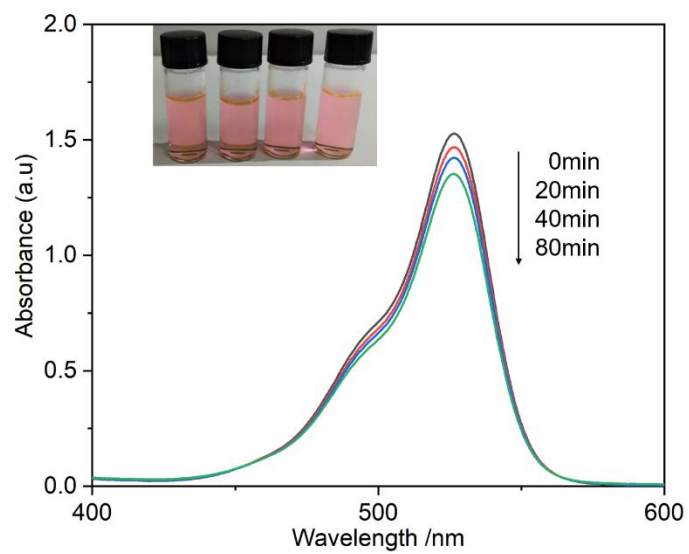

**Figure S10.** The absorption spectra of R6G on the  $\alpha\text{-Fe}_2\text{O}_3\text{-1}$  in the absence of  $\text{H}_2\text{O}_2$  with different illumination times: 0~80 min.

5

10

15

20

25
